# Supplementary material for: Abacavir, an anti–HIV-1 drug, targets TDP1-deficient adult T cell leukemia
Source: PubMed Central journal article supplement — Sci Adv. 2015 Apr 24;1(3):e1400203. doi: 10.1126/sciadv.1400203 (PMC4640626; doi:10.1126/sciadv.1400203), 2015-04-24
Supplement: 1400203_SM.pdf [file 1400203_SM.pdf]

## Supplementary Materials for **Abacavir, an anti-HIV-1 drug, targets TDP1-deficient adult T cell leukemia**

Kohei Tada, Masayuki Kobayashi, Yoko Takiuchi, Fumie Iwai, Takashi Sakamoto, Kayoko Nagata, Masanobu Shinohara, Katsuhiko Io, Kotaro Shirakawa, Masakatsu Hishizawa, Keisuke Shindo, Norimitsu Kadowaki, Kouji Hirota, Junpei Yamamoto, Shigenori Iwai, Hiroyuki Sasanuma, Shunichi Takeda, Akifumi Takaori-Kondo

Published 24 April 2015, *Sci. Adv.* **1**, e1400203 (2015)  
DOI: 10.1126/sciadv.1400203

### **This PDF file includes:**

- Fig. S1. ABC selectively kills HTLV-1-infected and ATL cell lines.
- Fig. S2. Cell counting assays showing ABC cytotoxicity to MT-2 cells.
- Fig. S3. ABC-induced apoptosis.
- Fig. S4. Relative sensitivities to six NRTIs of DT40 cells deficient in the indicated gene.
- Fig. S5. The relative sensitivity of candidate gene-deficient DT40 cells to the six individual NRTIs and the level of the mRNA expression in ATL cells.
- Fig. S6. Ectopic expression of *TDP1*<sup>WT</sup>, *TDP1*<sup>H263A</sup>, and *TDP1*<sup>H493R</sup> in MT-2 cells.
- Fig. S7. ABC and AZT cytotoxicity in MT-2/*TDP1*<sup>WT</sup> cells.
- Fig. S8. CPT11 and veliparib enhance the lethality of ABC on ATL cells.
- Table S1. Inhibitory concentration (IC<sub>50</sub>) values of ABC for each cell line.
- Table S2. Isogenic mutant chicken DT40 cell lines used in this study.
- Table S3. Characteristics of two ATL patients.
- Table S4. List of HTLV-1-infected and ATL cell lines.
- References (48–84)

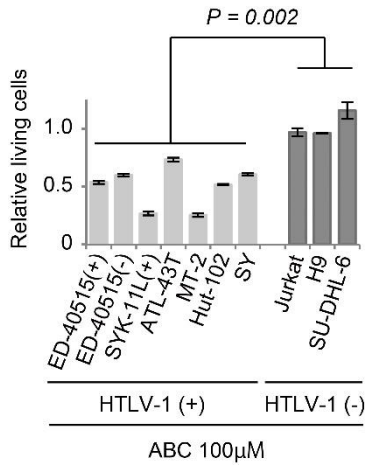

**Fig. S1. ABC selectively kills HTLV-1–infected and ATL cell lines.** Viability of indicated cells following treatment (2 days) with 100  $\mu$ M of ABC. MTS values of treated cells relative to untreated cells are shown. Results are expressed as means  $\pm$  SD of three independent experiments. Statistical analysis was performed using Student’s t-test to compare the relative living cells between the HTLV-1(+) cell lines and the non-HTLV-1-infected cell lines.

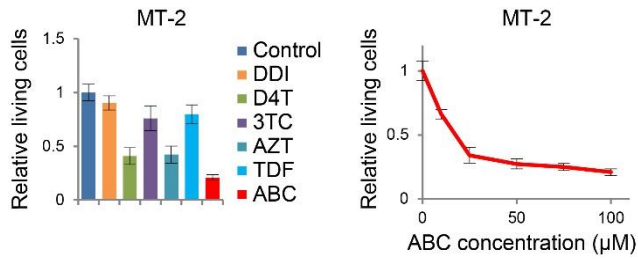

**Fig. S2. Cell counting assays showing ABC cytotoxicity to MT-2 cells.** MT-2 cells were treated with 100 μM of one of six nucleoside-analog reverse-transcriptase inhibitors (NRTIs, left panel) or escalating doses of ABC (right panel) for 2 days. The cells were counted using Trypan blue staining. Numbers of treated relative to untreated cells are shown. Results expressed as means  $\pm$  SD of three independent experiments.

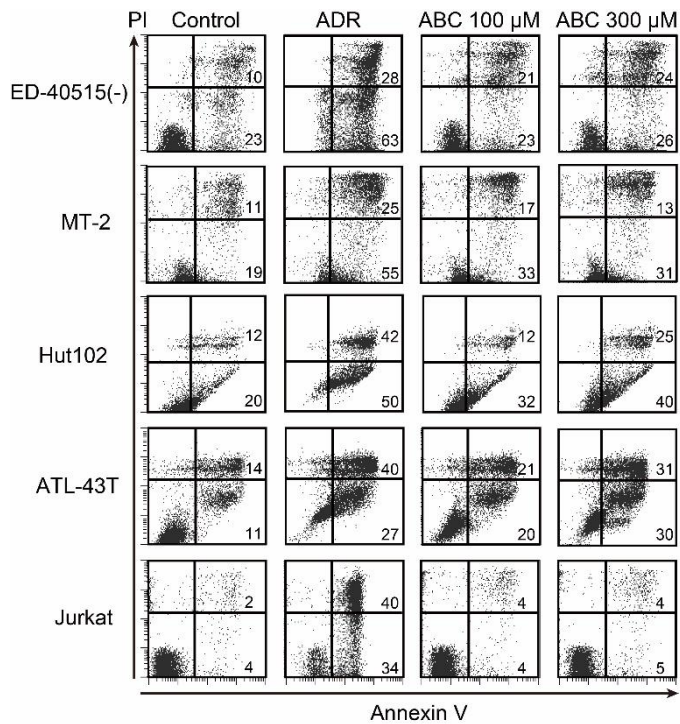

**Fig. S3. ABC-induced apoptosis.** Apoptosis was analyzed by flow cytometry after

Annexin V and PI staining. ED-40515(-), MT-2, Hut-102, ATL-43T, and Jurkat cells were treated with the indicated dose of ABC or 1 μg/ml ADR for 48 hours. The lower-left panel represents viable cells, the lower-right panel represents early apoptotic cells, and the upper-right panel represents late apoptotic cells. The values are expressed as the percentages of cells in each region. ADR treatment was used as a positive control.

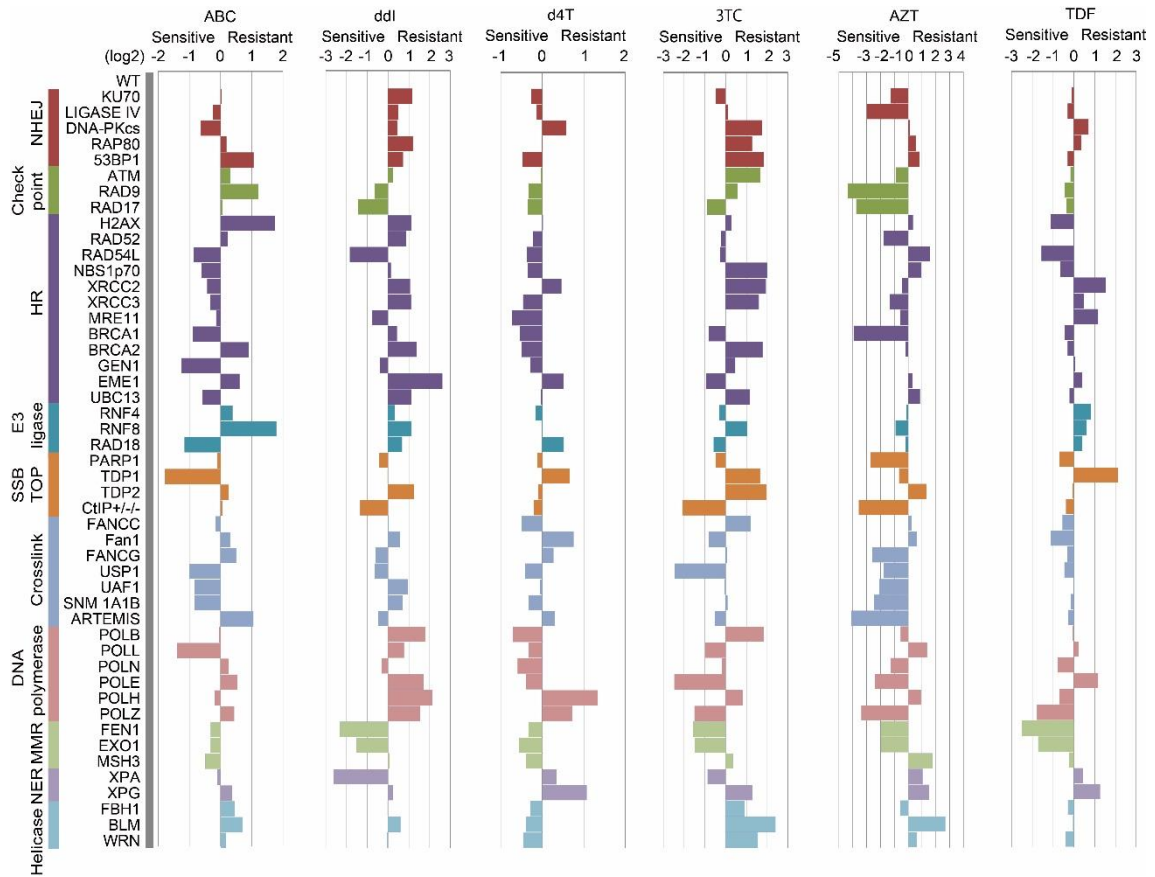

**Fig. S4. Relative sensitivities to six NRTIs of DT40 cells deficient in indicated gene.**

After 48 hours of treatment, the relative sensitivity of each isogenic mutant chicken DT40 cell line was compared to that of the *wild-type* DT40 cell line. Negative (left) or positive (right) scores indicate that the cell line was either sensitive or resistant to the specified nucleoside-analog reverse-transcriptase inhibitor (NRTI). The relative sensitivities of the selected DNA-repair-deficient DT40 cell lines to 25  $\mu\text{M}$  of the drug are shown. Bars are colored according to the primary DNA-repair function of the deficient gene (shown in Table S2).

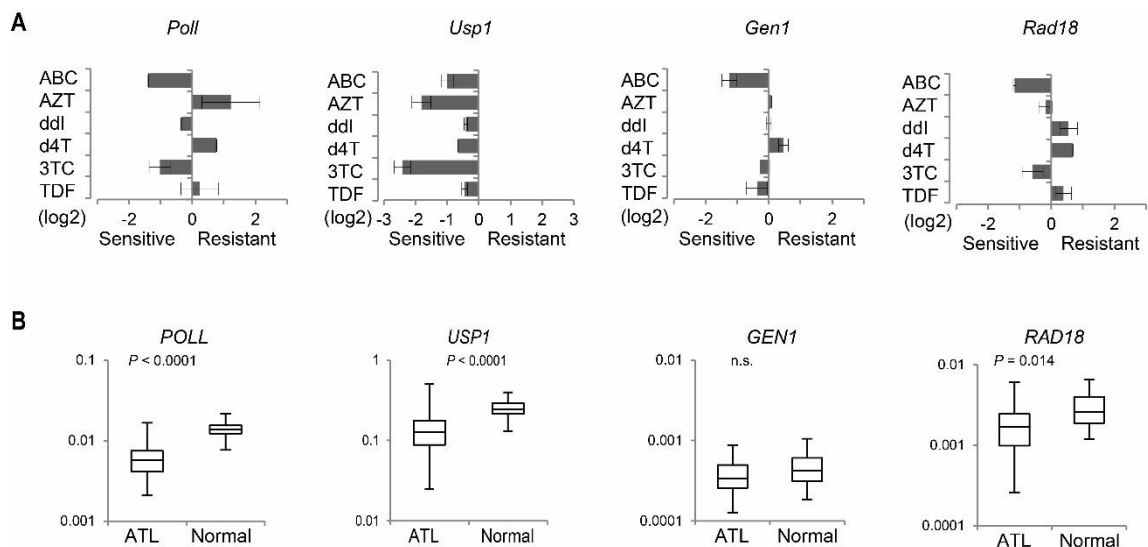

**Fig. S5. The relative sensitivity of candidate gene-deficient DT40 cells to the six**

**individual NRTIs and the level of the mRNA expression in ATL cells. (A)**

Relative sensitivities of DT40 cells deficient in *Poll*, *Usp1*, *Gen1*, *Rad18*

treated with 6 NRTIs. Results are expressed as means  $\pm$  SD of three

independent experiments. **(B)** Analysis of mRNA-expression levels based on

microarray data from the Gene Expression Omnibus (GEO) database (available

at <http://www.ncbi.nlm.nih.gov/geo/>; accession number GSE33615). Relative

expression levels of *POLL*, *USP1*, *GEN1*, *RAD18* in peripheral blood cells

obtained from ATL patients and normal healthy donor controls are shown. The

box plot uses the median, the approximate quartiles, and the lowest and highest

data points to convey the level, spread, and symmetry of the distribution of

data values. Statistical analysis was performed using Student's t-test to

compare the mRNA expression levels between the ATL cases (n=52) and the normal controls (n=21).

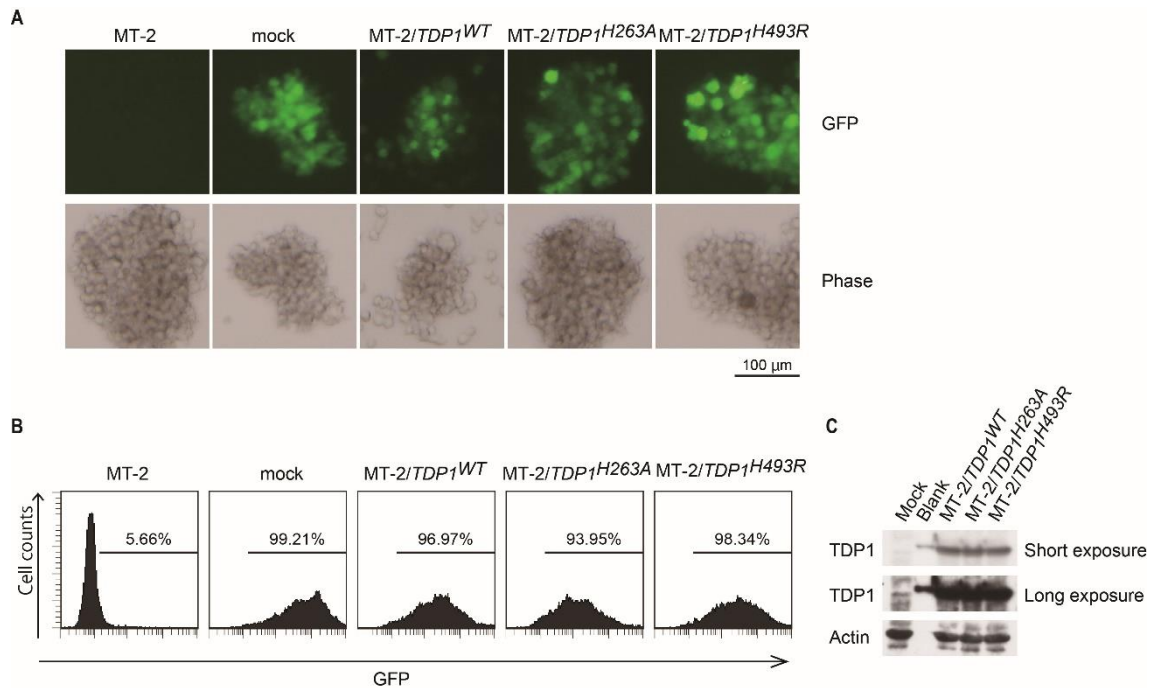

**Fig. S6.** Ectopic expression of *TDP1*<sup>WT</sup>, *TDP1*<sup>H263A</sup>, and *TDP1*<sup>H493R</sup> in MT-2 cells. MT-2/*TDP1*<sup>WT</sup>, MT-2/*TDP1*<sup>H263A</sup> or MT-2/*TDP1*<sup>H493R</sup> clones ectopically expressed *wild-type*, H263A, or H493R TDP1 in MT2 cells using humanized Renilla reniformis-derived, GFP (hrGFP)-containing lentiviral vectors. **(A)** hrGFP expression based on fluorescence microscopy. **(B)** hrGFP expression based on flow cytometry. **(C)** Western blot analysis of human TDP1 expression.



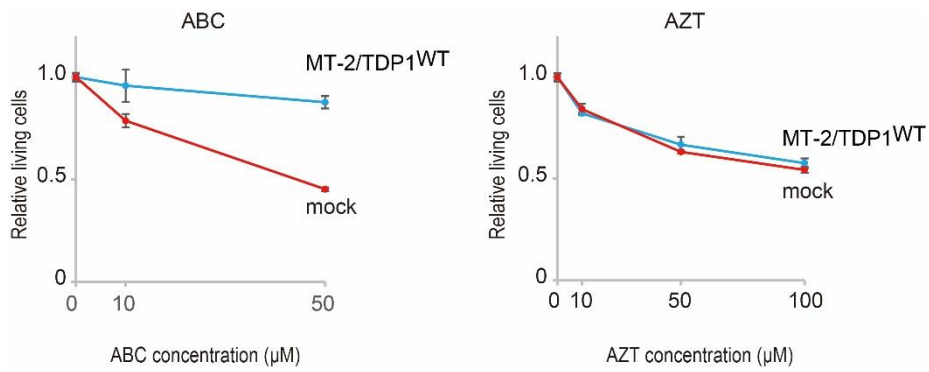

**Fig. S7. ABC and AZT cytotoxicity in MT-2/TDP1<sup>WT</sup> cells.** MT-2 cells reconstituted with *wild-type* TDP1 or mock-reconstituted cells were treated with the indicated dose of ABC (left panel) or AZT (right panel) for 48 hours. The MTS values relative to those of the untreated cells are shown.

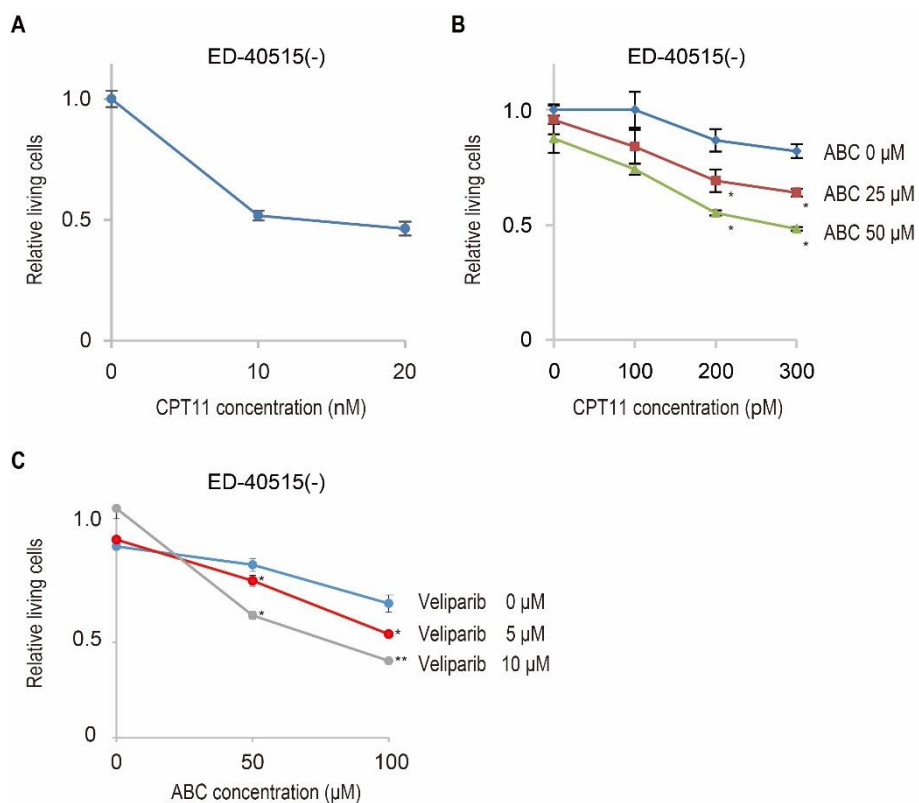

**Fig. S8. CPT11 and veliparib enhance the lethality of ABC on ATL cells. ED-40515(-) cells were treated with CPT11 or veliparib for 3 days and analyzed with an MTS assay. Cells were treated with (A) indicated concentrations of CPT11 or (B) indicated concentrations of CPT11 with 0 μM, 25 μM, or 50 μM of ABC. (C) ED-40515(-) cells were treated with the indicated concentrations of ABC and 0 μM, 5 μM, or 10 μM veliparib. MTS values relative to day 0 are shown. Results are expressed as means ± SD of three independent experiments. \*CI = 0.3 - 0.7 and \*\*CI = 0.1 - 0.3 are indicated as synergy and strong synergy between the two treatments, respectively.**

**Table S1. Inhibitory concentration (IC<sub>50</sub>) values of ABC for each cell line.**

| cell line   | IC <sub>50</sub> (μM) |
|-------------|-----------------------|
|             | ABC                   |
| ED-40515(-) | 117.6 ± 3.11          |
| ED-40515(+) | 147.00 ± 4.23         |
| SYK-11L(+)  | 52.75 ± 0.20          |
| ATL-43T     | 180.08 ± 20.55        |
| MT-2        | 12.61 ± 1.53          |
| Hut-102     | 108.4 ± 1.4           |
| SY          | >200                  |
| Jurkat      | >200                  |
| H9          | >200                  |
| SU-DHL-6    | >200                  |

All data represent means ± SD of three independent experiments.

**Table S2. Isogenic mutant chicken DT40 cell lines used in this study (cell lines are ordered as in fig. S4).**

| <b>Cell lines</b> | <b>Function of deleted(mutated) gene(s), and annotation</b>                                           | <b>References</b> |
|-------------------|-------------------------------------------------------------------------------------------------------|-------------------|
| <i>KU70</i>       | Nonhomologous end-joining                                                                             | (48)              |
| <i>LIGASE IV</i>  | Nonhomologous end-joining                                                                             | (49)              |
| <i>DNA-PKcs</i>   | Nonhomologous end-joining                                                                             | (50)              |
| <i>RAP80</i>      | Functional interaction with Top2, component of BRCA1-a complex,<br>K63 poly-ubiquitin binding protein | (51)              |
| <i>53BP1</i>      | Inhibition of HR                                                                                      | (52)              |
| <i>ATM</i>        | Damage check point control                                                                            | (53)              |
| <i>RAD9</i>       | Damage check point control                                                                            | (54)              |
| <i>RAD17</i>      | Damage check point control                                                                            | (54)              |
| <i>H2AX</i>       | HR                                                                                                    | (55)              |
| <i>RAD52</i>      | HR                                                                                                    | (56)              |
| <i>RAD54L</i>     | HR                                                                                                    | (57)              |
| <i>NBS1p70</i>    | HR                                                                                                    | (58)              |
| <i>XRCC2</i>      | HR                                                                                                    | (59)              |
| <i>XRCC3</i>      | HR                                                                                                    | (59)              |

| <b>Cell lines</b> | <b>Function of deleted(mutated) gene(s), and annotation</b>    | <b>References</b> |
|-------------------|----------------------------------------------------------------|-------------------|
| <i>MRE11</i>      | HR                                                             | (60)              |
| <i>BRCA1</i>      | HR                                                             | (61)              |
| <i>BRCA2</i>      | HR                                                             | (62)              |
| <i>GEN1</i>       | HR                                                             | Unpublished       |
| <i>EME1</i>       | HR                                                             | Unpublished       |
| <i>UBC13</i>      | E2 ligase, post-replication repair, HR                         | (63)              |
| <i>RNF4</i>       | E3 ligase                                                      | (64)              |
| <i>RNF8</i>       | E3 ligase, DSB repair                                          | (65)              |
| <i>RAD18</i>      | E3 ligase of PCNA, post-replication repair                     | (66)              |
| <i>PARP1</i>      | DNA damage sensing, poly(ADP-rybosyl)ation, SSB and DSB repair | (67)              |
| <i>TDP1</i>       | Removal of Top1 cleavage complex (Top1cc)                      | (32)              |
| <i>TDP2</i>       | Removal of Top2 cleavage complex (Top2cc)                      | (68)              |
| <i>CtIP+/-</i>    | Heterozygous knockout of CtIP gene                             | (69)              |
| <i>FANCC</i>      | Interstrand crosslink repair, HR                               | (70)              |
| <i>Fan1</i>       | Interstrand crosslink repair, HR                               | (71)              |
| <i>FANCG</i>      | Interstrand crosslink repair, HR                               | (72)              |

| <b>Cell lines</b> | <b>Function of deleted(mutated) gene(s), and annotation</b> | <b>References</b> |
|-------------------|-------------------------------------------------------------|-------------------|
| <i>USP1</i>       | Interstrand crosslink repair, HR                            | (73)              |
| <i>UAF1</i>       | Interstrand crosslink repair, HR, USP1 association factor   | (73)              |
| <i>SNM 1A1B</i>   | Interstrand crosslink repair                                | (74)              |
| <i>ARTEMIS</i>    | 5'-3' exonuclease, nonhomologous end-joining                | (74)              |
| <i>POLB</i>       | Base excision repair                                        | (75)              |
| <i>POLL</i>       | DNA polymerase, base excision repair                        | (75)              |
| <i>POLN</i>       | Translesion synthesis DNA polymerase                        | (76)              |
| <i>POLE</i>       | Nuclear excision repair, mismatch repair                    | Unpublished       |
| <i>POLH</i>       | Translesion synthesis DNA polymerase                        | (77)              |
| <i>POLZ</i>       | Translesion synthesis DNA polymerase                        | (78)              |
| <i>FEN1</i>       | 5' flap endonuclease, base excision repair, HR              | (79)              |
| <i>EXO1</i>       | Mismatch repair                                             | Unpublished       |
| <i>MSH3</i>       | Mismatch repair                                             | Unpublished       |
| <i>XPA</i>        | Nuclear excision repair                                     | (80)              |
| <i>XPG</i>        | Nuclear excision repair                                     | (81)              |
| <i>FBH1</i>       | DNA helicase, phenotype similar to BLM                      | (82)              |

| <b>Cell lines</b> | <b>Function of deleted(mutated) gene(s), and annotation</b> | <b>References</b> |
|-------------------|-------------------------------------------------------------|-------------------|
| <i>BLM</i>        | RecQ helicase responsible for Bloom syndrome                | (83)              |
| <i>WRN</i>        | RecQ helicase responsible for Bloom syndrome                | (84)              |

HR = homologous recombination.

**Table S3. Characteristics of two ATL patients (cells ordered as in Fig. 5F).**

|       | Age | Gender | Type  | Disease status    | Cell isolation site | ATL cell % |
|-------|-----|--------|-------|-------------------|---------------------|------------|
| ATL 1 | 61  | Male   | acute | Refractory        | Peripheral blood    | 94         |
| ATL 2 | 60  | Male   | acute | Relapse after SCT | Skin tumor          | 93         |



**Table S4. List of HTLV-1–infected and ATL cell lines.**

| Cell line   | Leukemic origin<br>(ATL cells) | HTLV-1 replication | IL-2 dependency |
|-------------|--------------------------------|--------------------|-----------------|
| ED-40515(-) | +                              | -                  | -               |
| ED-40515(+) | +                              | -                  | +               |
| SYK-11L(+)  | +                              | -                  | +               |
| ATL-43T     | +                              | -                  | +               |
| MT-2        | -                              | +                  | -               |
| Hut-102     | +                              | +                  | -               |
| SY          | -                              | -                  | +               |
